# Supplementary material for: Antiangiogenic effects in patients with progressive desmoplastic small round cell tumor: data from the French national registry dedicated to the use of off-labeled targeted therapy in sarcoma (OUTC’s)
Source: Springer Nature journal article supplement (doi:10.1186/s13569-017-0076-4), 2017-05-10
Supplement: MOESM1 [file 12275190]

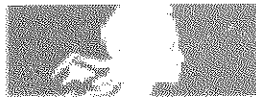

Liberté - Égalité - Fraternité  
RÉPUBLIQUE FRANÇAISE

ministère  
enseignement  
supérieur  
recherche

DIRECTION GÉNÉRALE DE LA RECHERCHE  
ET DE L'INNOVATION

### Comité consultatif sur le traitement de l'information en matière de recherche dans le domaine de la santé

**Dossier n° :** 09.095bis

**Intitulé de la demande :** Observatoire de l'Utilisation des Thérapeutiques Ciblées dans le domaine des Sarcomes.

**Demandeur :** Centre Léon Bérard  
**Monsieur Thierry PHILIP**  
28, rue Laënnec  
69373 LYON Cedex 08

**Responsable :** Isabelle RAY-COQUARD

**Dossier reçu le :** 6 mai 2009

**Dossier examiné le :** 4 juin 2009

**Avis du Comité consultatif :**

Avis favorable

Fait à Paris, le 11 juin 2009

Le Président du Comité consultatif

Mahmoud ZUREIK
