# Supplementary material for: Antiangiogenic effects in patients with progressive desmoplastic small round cell tumor: data from the French national registry dedicated to the use of off-labeled targeted therapy in sarcoma (OUTC’s)
Source: Springer Nature journal article supplement (doi:10.1186/s13569-017-0076-4), 2017-05-10
Supplement: MOESM2 [file 12275190]

Le Président

Madame Isabelle RAY-COQUARD  
CENTRE LEON BERARD  
CLB  
EVALUATION DES PRATIQUES MEDICALES  
28 RUE LAENNEC  
69373 - LYON CEDEX 03

Paris, le - 2 DEC. 2009

N/Réf. : AT/YPA/SV/SN/GDP/AR091413

Objet : NOTIFICATION D'AUTORISATION

**DEMANDE D'AUTORISATION N° 1375805**

**A rappeler dans toute correspondance**

Madame,

Vous avez saisi le 17 juillet 2009 notre Commission d'une demande d'autorisation relative à un traitement de données à caractère personnel ayant pour finalité

OBSERVATOIRE DE L'UTILISATION DES THERAPEUTIQUES CIBLEES DANS LE  
DOMAINE DES SARCOMES

Ce traitement relève de la procédure des articles 54 et suivants de la loi du 6 janvier 1978 modifiée.

En conséquence, conformément aux dispositions de l'article 15 de la loi du 6 janvier 1978 modifiée relative à l'informatique, aux fichiers et aux libertés et après réception de vos compléments, j'autorise la mise en œuvre de ce traitement.

Je vous prie, Madame, d'agréer l'expression de mes salutations distinguées.



Alex TÜRK
